# Supplementary material
Source: PubMed Central journal article supplement (PMC3092471)
Supplement: NIHMS286425-supplement-2.pdf [file NIHMS286425-supplement-2.pdf]

**Supplementary Table 1. Age and gender adjusted association of traditional risk factors with coronary artery calcification**

| <b>Individual risk factor</b>                 | <b>Whites n= 586</b>         | <b>African-Americans n= 275</b> |
|-----------------------------------------------|------------------------------|---------------------------------|
| Age (years)                                   |                              |                                 |
| 35-45                                         | reference                    | reference                       |
| 46-55                                         | 1.38 (0.08-24.9) (p=0.827)   | 0.27 (0.00-68.4) (p=0.638)      |
| 56-65                                         | 120.8 (28.0-520.5) (p<0.001) | 8.24 (0.24-283.4) (p=0.240)     |
| >65                                           | 264.4 (90.0-777.2) (p<0.001) | 932.2 (94.9-9157.7) (p<0.001)   |
| Gender                                        | 10.7 (6.24-18.4) (p<0.001)   | 6.11 (2.01-18.6) (p=0.002)      |
| Smoking history                               | 2.73 (1.18-6.35) (p=0.020)   | 3.83 (0.87-16.9) (p=0.076)      |
| Systolic blood pressure (per 10 mmHg)         | 1.00 (0.85-1.17) (p=0.976)   | 1.25 (0.88-1.78) (p=0.210)      |
| Diastolic blood pressure (per 10 mmHg)        | 0.85 (0.65-1.11) (p=0.231)   | 1.28 (0.71-2.32) (p=0.408)      |
| Total cholesterol <sup>a</sup> (per 30 mg/dl) | 1.14 (0.95-1.37) (p=0.158)   | 0.86 (0.57-1.32) (p=0.494)      |
| LDL cholesterol <sup>a</sup> (per 10 mg/dl)   | 1.07 (0.99-1.17) (p=0.100)   | 0.82 (0.68-0.98) (p=0.034)      |
| HDL cholesterol (per 5 mg/dl)                 | 0.85 (0.77-0.93) (p=0.001)   | 1.01 (0.82-1.24) (p=0.922)      |
| Hypertension                                  | 1.47 (0.91-2.38) (p=0.119)   | 3.60 (1.07-12.1) (p=0.039)      |

Estimates are presented as Tobit ratios (95% confidence intervals) for change in CAC+1 for a specific risk factor (e.g. male vs. female).

There were no significant gender-risk factor interactions for any risk factor.

<sup>a</sup> Adjusted for statin use
